# Supplementary material
Source: PubMed Central journal article supplement (PMC6647018)
Supplement: NIHMS1035017-supplement-Supplemental.pdf [file NIHMS1035017-supplement-Supplemental.pdf]

**Newly enrolled  
MSVD Patients**  
(N=221)

**Eligible, completed baseline  
ESAS (n=104)**

**Not enrolled (n=18)**  
Refused, n=12  
Lost to follow up, n=6

**Enrolled (n=86)**

**Moderate/severe  
pain (n=23)**

**Mild/No pain  
(n=63)**

**Completed  
study (n=21)**

**Did not complete  
study (n=2)**  
Died, n=2

**Completed  
study (n=53)**

**Did not complete  
study (n=10)**  
Died, n=7  
Switched provider,  
n=3

**Excluded (n=117)**

No Baseline ESAS (n=111)

- Advanced dementia, no good proxy (n=29)
- Nonverbal, no good proxy (n=19)
- Patient did not understand (n=14)
- Language barrier (n=10)
- Patient refused (n=8)
- Lack of time at visit (n=6)
- Patient too fatigued (n=3)
- Patient unable to answer clearly (n=3)
- Patient actively dying (n=2)
- Other, missing (n=17)

Completed baseline ESAS (n=6)

- Patient did not speak English (n=1)
- Patient left practice before contact (n=1)
- Patient died before contact (n=4)

**BASELINE**

**6 MONTHS**

Supplemental Figure 1. Study Flow Diagram.

| <b>Supplemental Table 1. List of opioid and non-opioid medications.</b> |                                                                                                                                                                                                                                                                                                                                                                                                                                                                                                                                                                 |
|-------------------------------------------------------------------------|-----------------------------------------------------------------------------------------------------------------------------------------------------------------------------------------------------------------------------------------------------------------------------------------------------------------------------------------------------------------------------------------------------------------------------------------------------------------------------------------------------------------------------------------------------------------|
| <b>Medication Category</b>                                              | <b>Medication names</b>                                                                                                                                                                                                                                                                                                                                                                                                                                                                                                                                         |
| <b>Acetaminophen</b>                                                    | Tylenol, Panadol, Mapap, Temptra, Ofirmev, Mejoralito, Feverall, Apap, Acephen, Xl-dol, Nortemp, Aypanal, Aphen, Bf-paradac, Ringl                                                                                                                                                                                                                                                                                                                                                                                                                              |
| <b>NSAIDs</b>                                                           | Ibuprofen (Advil, Midol, NeoProfen, Ibu, Motrin, Caldolor), Diclofenac (oral and gel: Voltaren), Indomethacin (Indocin), Meloxicam (Mobic), Naproxen (Naprosyn, Naprelan, Aleve, Anaprox), Sulindac (Clinoril), Celecoxib (Celebrex), Choline magnesium trisalicylate (Tricosal, Trilisate), Salsalate (Disalcid, Mono-Gesic, Salflex), Nabumetone (Relafen), Ketorolac (Toradol, Sprix, Acuvail, Acular)                                                                                                                                                       |
| <b>Opioid Medications</b>                                               | Hydromorphone (Dilaudid, Hydrostat), Tramadol (Ultram/Ultram ER), Oxycodone (Oxycontin, OxyIR, Percocet, Percodan, Tylox, Combunox), Fentanyl patch (Duragesic), Morphine (PO, sublingual, suppository. Immediate release: MSIR, Roxanol. Sustained release: Avinza, Kadian, MS Contin, Oramorph SR), Methadone (Dolophine), Codeine, Hydrocodone (Lorcet, Lortab, Norco, Vicodin, Vicoprofen), Oxymorphone (Immediate: Opana IR, Extended: Opana ER)                                                                                                           |
| <b>Adjuvants</b>                                                        | Sumatriptan (Imitrex), Gabapentin (Neurontin), Tricyclic antidepressants (Desipramine (Norpramin), Nortriptyline (Aventyl, Pamelor), Amitriptyline (Elavil)), Pregabalin (Lyrica), Baclofen (Lioresal), Cyclobenzaprine, Lamotrigine (Lamictal), Duloxetine (Cymbalta), Venlafaxine (Effexor), Milnacipran (Savella), Carbamazepine (Tegretol), Mexiletine (Mexitil), Tizanidine (Zanaflex), Levetiracetam (Keppra), Divalproex (Depakote), Corticosteroids: Dexamethasone, Prednisone (Deltasone, Liquid Pred, Orasone), methylprednisolone (Medrol dose pack) |
| <b>Other treatments</b>                                                 | Marcaine (injection), Kenalog (injection), Lidocaine (Xylocaine) (injection), Lidocaine/Depo medrol (injection), Methanol topical gel, Pheny lephrine-Witch Hazel gel, Preparation H                                                                                                                                                                                                                                                                                                                                                                            |

**Supplemental Table 2. Classification of opioid medications.**

| Long acting                      | Short acting                                | Weak     | Strong                                 | Transdermal    | Oral          | Liquid  |
|----------------------------------|---------------------------------------------|----------|----------------------------------------|----------------|---------------|---------|
| Morphine                         | Hydromorphone                               | Codeine  | Hydromorphone                          | Fentanyl patch | Hydromorphone | Roxanol |
| Fentanyl Patch                   | Tramadol                                    | Tramadol | Oxycodone                              |                | Tramadol      |         |
| Methadone                        | Oxycodone                                   |          | Oxycontin                              |                | Oxycodone     |         |
| Oxycontin                        | Morphine (Immediate release: MSIR, Roxanol) |          | Methadone                              |                | Oxycontin     |         |
| Oxymorphone (Extended: Opana ER) | Hydrocodone                                 |          | Morphine (PO, sublingual, suppository) |                | Morphine (PO) |         |
|                                  | Codeine                                     |          | Hydrocodone                            |                | Methadone     |         |
|                                  | Oxymorphone (Immediate: Opana IR)           |          | Fentanyl patch                         |                | Codeine       |         |
|                                  |                                             |          |                                        |                | Hydrocodone   |         |
